# Supplementary material for: A facile chemical-mechanical polishing lift-off transfer process toward large scale Cu(In,Ga)Se2thin-film solar cells on arbitrary substrates
Source: Royal Society of Chemistry journal article supplement (doi:10.1039/c5nr07008b), 2015-11-30
Supplement: c5nr07008b1.pdf [file c5nr07008b1.pdf]

## Supplementary Information

### A Facile Chemical-Mechanical Polishing Lift-Off Transfer Process Toward Large Scale Cu(In,Ga)Se<sub>2</sub> Thin-Film Solar Cells on Arbitrary Substrates

Kuan-Chun Tseng<sup>a</sup>, Yu-Ting Yen<sup>a</sup>, Stuart R. Thomas<sup>b</sup>, Hung-Wei Tsai<sup>a</sup>, Cheng –Hung Hsu<sup>a</sup>,  
Wen-Chi Tsai<sup>a</sup>, Chang-Hong Shen<sup>c</sup>, Jia-Min Shieh<sup>c</sup>, Zhiming M. Wang<sup>b</sup> and Yu-Lun Chueh

\*a

---

<sup>a</sup> Department of Materials Science and Engineering, National Tsing Hua University, Hsinchu, 30013, Taiwan, ROC. \*Email: ylchueh@mx.nthu.edu.tw

<sup>b</sup> Institute of Fundamental and Frontier Sciences, University of Electronic Science and Technology of China, People's Republic of China

<sup>c</sup> National Nano Device Laboratories, No. 26, Prosperity Road 1, Hsinchu 30078, Taiwan, ROC.

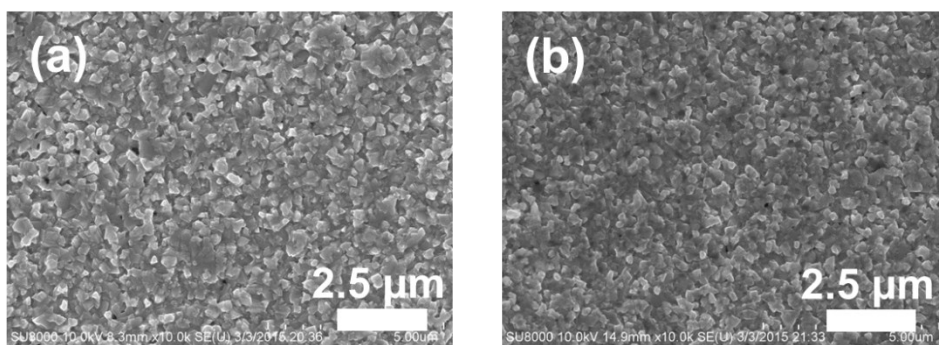

**Fig S1.** FE-SEM top view images showing (a) pristine CIGS film surface and (b) CIGS film surface after transfer process, showing no change in surface morphology.

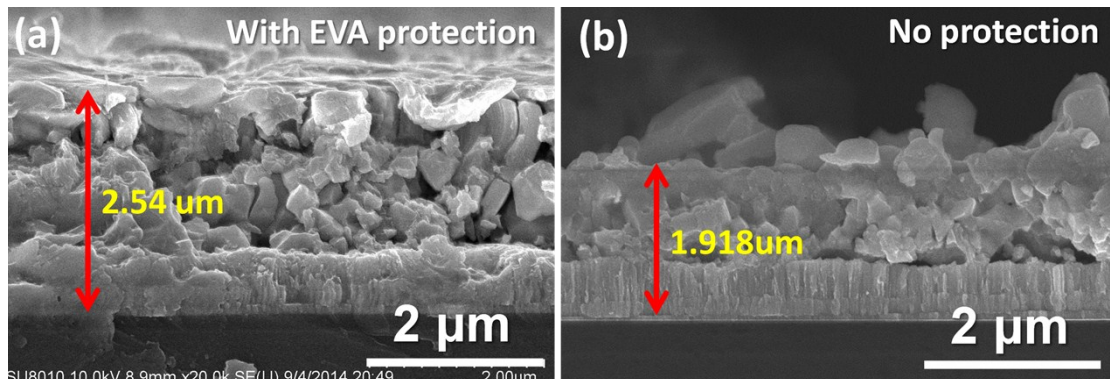

**Fig S2.** FE-SEM cross-sectional images showing (a) complete device structure following transfer to aluminum substrate (b) loss of transparent conducting oxide layers when no protective EVA/quartz protective layer is employed.

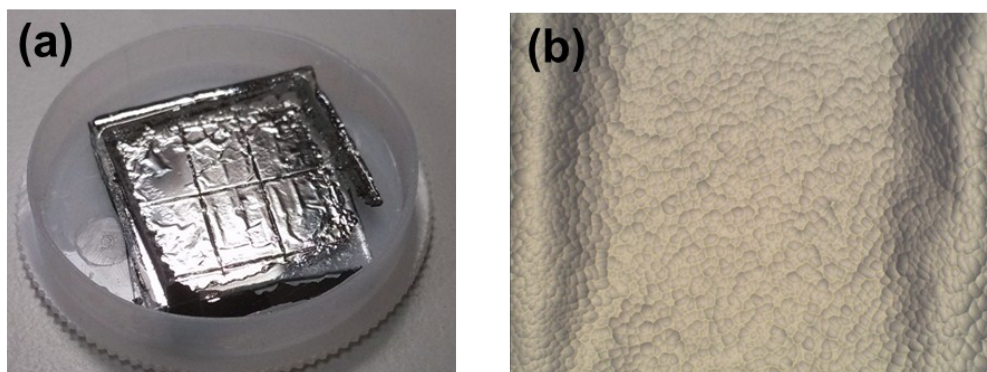

**Fig S2.** (a) Photo image of wrinkled Mo surface following removal of SLG via etching and mechanical grinding process and (b) 10X magnification of image (a).

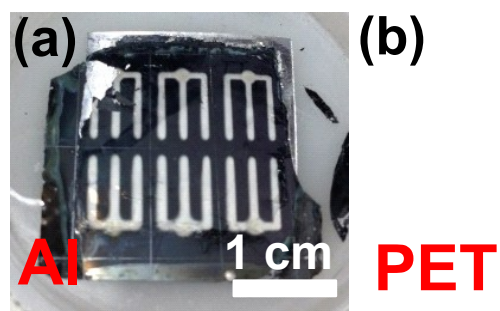

**Fig S4.** Optical images of solar cells on (a) aluminum foil and (b) polyethylene terephthalate (PET).

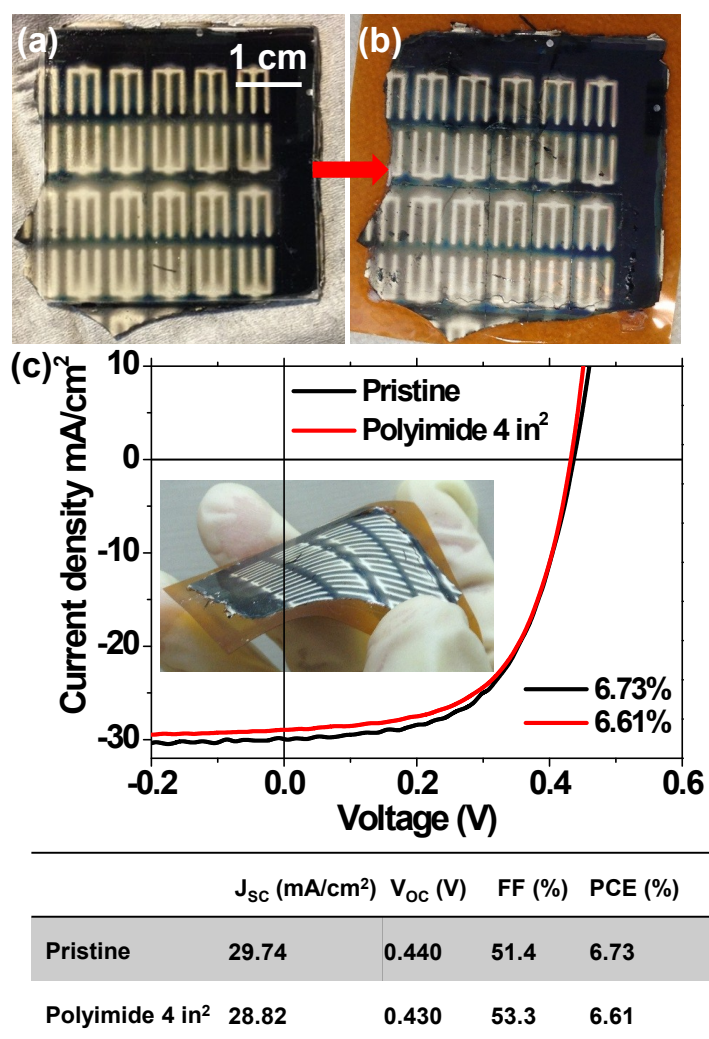

**Fig S5.** Optical images of solar cells transferred onto polyimide films (a) showing large scale 4 in<sup>2</sup> square fabrication, (b) flexibility of devices fabricated large substrates and (c) characterization data obtained from best performing devices after the post CMPL transfer.
